# Supplementary material for: Impact-based flood forecasting in the Greater Horn of Africa
Source: Copernicus journal article supplement (doi:10.5194/nhess-24-199-2024), 2024-01-26
Supplement: Supplementary file 1 [file nhess-24-199-2024-supplement.pdf]

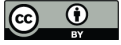

*Supplement of*

## **Impact-based flood forecasting in the Greater Horn of Africa**

**Lorenzo Alfieri et al.**

*Correspondence to:* Lorenzo Alfieri ([lorenzo.alfieri@cimafoundation.org](mailto:lorenzo.alfieri@cimafoundation.org))

The copyright of individual parts of the supplement might differ from the article licence.

## Hydrological model evaluation

Table S1: Performance of simulated versus observed discharge at 78 validation stations for the entire period of data availability, ranked by decreasing correlation values.

| ID | Name                                 | nRMSE | KGE   | Correlation (r) | Bias rate | Variability rate | longitude | latitude |
|----|--------------------------------------|-------|-------|-----------------|-----------|------------------|-----------|----------|
| 1  | Blue Nile River at GERD              | 0.51  | 0.84  | 0.92            | 1.09      | 0.9              | 34.92     | 11.24    |
| 2  | Nile River at Ad Damar               | 1.13  | 0.16  | 0.87            | 0.79      | 1.81             | 33.97     | 17.65    |
| 3  | Awash River at Hombole               | 1.06  | 0.67  | 0.86            | 1.29      | 0.94             | 38.78     | 8.38     |
| 4  | Blue Nile at El Roseires Dam         | 0.77  | 0.75  | 0.85            | 1.17      | 1.12             | 34.39     | 11.8     |
| 5  | Blue Nile at Khartoum Manshia Bridge | 1.26  | 0.5   | 0.85            | 0.97      | 1.47             | 32.53     | 15.61    |
| 6  | Nile at Khartoum Al Halfaia Bridge   | 0.88  | 0.44  | 0.84            | 0.87      | 1.52             | 32.56     | 15.98    |
| 7  | Awash River at Melka Kuntire         | 1.08  | 0.69  | 0.84            | 1.11      | 0.76             | 38.6      | 8.7      |
| 8  | Blue Nile River at Sennar            | 1.07  | 0.57  | 0.83            | 0.91      | 1.38             | 33.64     | 13.55    |
| 9  | Nile River at Dongola                | 1.52  | 0.06  | 0.83            | 0.96      | 1.92             | 30.49     | 19.18    |
| 10 | Ruvubu River at Muyiga               | 1.23  | -0.11 | 0.77            | 1.96      | 1.51             | 30.47     | -2.98    |
| 11 | Shabelle River at Beledweyne         | 0.71  | 0.72  | 0.75            | 0.98      | 1.13             | 45.2      | 4.74     |
| 12 | Tana River at Garsen                 | 0.88  | -0.11 | 0.73            | 1.97      | 0.54             | 40.12     | -2.28    |
| 13 | Awash River at Haro Adi              | 1.95  | -0.18 | 0.72            | 2.09      | 1.34             | 39.85     | 8.85     |
| 14 | White Nile River at Mongalla         | 0.17  | 0.5   | 0.67            | 0.63      | 0.91             | 31.77     | 5.2      |
| 15 | Shabelle River at Bulobarde          | 1.15  | 0.36  | 0.67            | 0.94      | 1.54             | 45.57     | 3.86     |
| 16 | Kachwamba River at Sofia             | 1.02  | -3.24 | 0.59            | 5.12      | 0.06             | 30.46     | -1.05    |
| 17 | Jubba River at Doolow                | 2.04  | -0.21 | 0.58            | 2.13      | 1.08             | 42.22     | 4.16     |
| 18 | Nzoia River at Ruambwa Ferry         | 0.96  | -0.21 | 0.58            | 1.88      | 0.29             | 34.09     | 0.12     |
| 19 | Awash River at Melka Sedi            | 1.82  | -0.99 | 0.56            | 2.94      | 1.06             | 40.13     | 9.39     |
| 20 | Jubba River at Luuq                  | 0.99  | 0.31  | 0.54            | 1.33      | 0.61             | 42.56     | 3.79     |
| 21 | White Nile River at Malakal          | 0.71  | 0.23  | 0.53            | 1.08      | 1.61             | 31.67     | 9.55     |
| 22 | Athi River at Munyu                  | 2.36  | -0.65 | 0.52            | 2.4       | 0.27             | 37.19     | -1.09    |
| 23 | Ewaso Narok River at Sosian          | 2.75  | 0.39  | 0.51            | 0.99      | 1.36             | 36.72     | 0.44     |
| 24 | Jubba River at Bardere               | 0.95  | -1.75 | 0.51            | 3.56      | 0.14             | 42.27     | 2.34     |
| 25 | Tana River at Sagana                 | 1.44  | -3.35 | 0.48            | 5.24      | 0.19             | 37.21     | -0.67    |
| 26 | Songwe River at Galula               | 1.46  | -0.99 | 0.47            | 2.72      | 0.13             | 33.06     | -8.73    |
| 27 | Mbarali River at Igawa               | 1.24  | -1.2  | 0.47            | 2.99      | 0.22             | 34.38     | -8.78    |
| 28 | Awash River at Adaitu                | 1.12  | 0.21  | 0.45            | 1.45      | 0.66             | 40.78     | 11.13    |
| 29 | Lukuledi River at Mkwaya             | 9.05  | -1.18 | 0.44            | 2.41      | 2.57             | 39.66     | -10.14   |
| 30 | Great Ruaha River at Msembe          | 1.97  | -0.01 | 0.44            | 1.48      | 0.31             | 34.9      | -7.71    |
| 31 | Thiba River at Nyamindi confluence   | 4.67  | -0.21 | 0.43            | 1.43      | 0.01             | 37.51     | -0.73    |
| 32 | Gucha River at Migori                | 1.16  | 0.22  | 0.41            | 1.41      | 0.69             | 34.21     | -0.95    |
| 33 | Ruvyironza River at Kibaya           | 1.13  | -0.36 | 0.41            | 2.21      | 1.14             | 29.92     | -3.32    |
| 34 | Mayanja River at Kapeka              | 1.17  | 0.03  | 0.41            | 1.67      | 0.62             | 32.17     | 0.68     |

|    |                                     |       |        |      |       |      |       |       |
|----|-------------------------------------|-------|--------|------|-------|------|-------|-------|
| 35 | Ruhuhu River at Mavanga             | 1.04  | -3.29  | 0.4  | 5.17  | 0.2  | 35.19 | -9.94 |
| 36 | Rovuma River at Ruvumachini         | 1.24  | -1.59  | 0.39 | 3.42  | 0.28 | 35.34 | -11.2 |
| 37 | Tana River at Garissa               | 1.15  | -2.82  | 0.36 | 4.68  | 0.18 | 39.7  | -0.45 |
| 38 | Kizigo River at Chinugulu           | 1.89  | 0.04   | 0.36 | 1.38  | 0.39 | 35.4  | -6.93 |
| 39 | Little Ruaha River at Mawande       | 1.24  | -1.73  | 0.35 | 3.5   | 0.13 | 35.46 | -7.5  |
| 40 | Wami River at Dakawa                | 1.8   | -1.22  | 0.34 | 2.93  | 0.12 | 37.53 | -6.45 |
| 41 | Lach Dera River at Elkarama         | 6.95  | -0.57  | 0.34 | 0.92  | 2.42 | 36.91 | 0.09  |
| 42 | Rumpungwe River at Gisuru           | 1.83  | -0.34  | 0.34 | 1.67  | 0.04 | 30.49 | -3.44 |
| 43 | Great Ruaha River at Salimwani      | 1.78  | -0.81  | 0.33 | 2.4   | 0.06 | 34.11 | -8.9  |
| 44 | Ruvubu River at Kanabusoro          | 1.11  | 0.05   | 0.33 | 1.63  | 0.77 | 29.71 | -3.03 |
| 45 | Ruaha River Tributary at Kilolo     | 1.13  | -3.28  | 0.32 | 5.14  | 0.15 | 35.78 | -8.02 |
| 46 | Ruaha River at Iringa               | 1.18  | -2.13  | 0.32 | 3.93  | 0.12 | 35.72 | -7.79 |
| 47 | Malagarasi River at Mbelagule       | 1.13  | -0.42  | 0.31 | 2.19  | 0.66 | 30.08 | -5.18 |
| 48 | Wami River at Mandera T2            | 1.55  | -1.67  | 0.3  | 3.39  | 0.03 | 38.39 | -6.25 |
| 49 | Basse Mulembwe at Mutambara         | 1.08  | -3.91  | 0.3  | 5.76  | 0.03 | 29.44 | -4    |
| 50 | Ruvu River at Kibaha                | 1.62  | -1.33  | 0.3  | 3.06  | 0.16 | 38.71 | -6.69 |
| 51 | Mutonga River at Kierera            | 1.55  | -2.27  | 0.29 | 4.07  | 0.13 | 37.9  | -0.38 |
| 52 | Tsavo River at Tsavo                | 1.2   | -14.78 | 0.29 | 16.74 | 0.07 | 38.47 | -3    |
| 53 | Kigogo Ruaha River at Lugema        | 1.14  | -3.29  | 0.29 | 5.14  | 0.14 | 35.34 | -8.77 |
| 54 | Kagera River at Masangano           | 10.95 | -6.53  | 0.27 | 1     | 8.5  | 31.76 | -0.94 |
| 55 | Tana River at Hola                  | 0.9   | -0.7   | 0.27 | 2.32  | 0.21 | 40.03 | -1.5  |
| 56 | Luichi River at Isangwa             | 1.34  | -1.26  | 0.26 | 3.03  | 0.34 | 31.6  | -7.74 |
| 57 | Ruaha River at Mafinga              | 1.25  | -1.47  | 0.26 | 3.19  | 0.12 | 35.33 | -8.37 |
| 58 | Kimani River at GreatNorthRoad      | 1.71  | -1.49  | 0.26 | 3.17  | 0.05 | 34.17 | -8.85 |
| 59 | Ndembera River at Ilongo            | 1.62  | -1.18  | 0.25 | 2.84  | 0.11 | 35.16 | -8.26 |
| 60 | Ruvu River at Kifaru                | 1.42  | -5.01  | 0.24 | 6.87  | 0.01 | 37.56 | -3.53 |
| 61 | Lufilyo River at Lufilyo            | 1.07  | -2.21  | 0.23 | 4     | 0.16 | 33.92 | -9.32 |
| 62 | Kafu River at Nile confluence       | 2     | 0.16   | 0.23 | 1.21  | 1.27 | 32.04 | 1.55  |
| 63 | Kagogo River at Gatore              | 1.04  | -8.07  | 0.22 | 9.99  | 0.07 | 30.56 | -2.27 |
| 64 | Ruizi River at Mbarara              | 1.28  | -1.36  | 0.22 | 3.01  | 0.05 | 30.65 | -0.62 |
| 65 | Nyabarongo River at Mugesera        | 0.99  | -6.43  | 0.2  | 8.33  | 0.04 | 30.28 | -2.2  |
| 66 | Kagera River at Resumo              | 1.01  | -7.1   | 0.18 | 9     | 0.03 | 30.78 | -2.38 |
| 67 | Pangani River at Mnyuzi             | 1.45  | -3.01  | 0.18 | 4.8   | 0.04 | 38.56 | -5.23 |
| 68 | Victoria Nile River at Karuma Falls | 0.5   | -0.58  | 0.18 | 2.34  | 1.17 | 32.27 | 2.27  |
| 69 | White Nile River at Jebel Aulia Dam | 2.34  | -1.17  | 0.16 | 1.76  | 2.85 | 32.49 | 15.25 |
| 70 | Buzimba River at Gatete             | 1.4   | -1.15  | 0.16 | 2.76  | 0.09 | 29.54 | -4.17 |

|    |                                     |      |       |      |      |      |       |       |
|----|-------------------------------------|------|-------|------|------|------|-------|-------|
|    |                                     |      |       |      |      |      |       |       |
| 71 | White Nile at Panyango              | 0.29 | 0.14  | 0.15 | 0.96 | 1.07 | 31.43 | 2.57  |
| 72 | Mbaka River at Mwaya                | 1.25 | -1.18 | 0.13 | 2.83 | 0.19 | 33.96 | -9.52 |
| 73 | Awash River at Tendaho              | 1.61 | 0.01  | 0.11 | 1.27 | 0.65 | 40.95 | 11.68 |
| 74 | Victoria Nile River at Masindi Port | 0.63 | -0.46 | 0.11 | 2.12 | 1.28 | 32.09 | 1.69  |
| 75 | Mvuha River at Tulo School          | 1.31 | -4.79 | 0.1  | 6.63 | 0.03 | 37.92 | -7.24 |
| 76 | Ruvu River at Kibangile             | 1.41 | -3.22 | 0.09 | 5    | 0.03 | 37.8  | -7.02 |
| 77 | Victoria Nile at Paraa              | 0.59 | -0.14 | 0.07 | 1.61 | 1.23 | 31.56 | 2.28  |
| 78 | Victoria Nile River at Mbulamuti    | 0.67 | -1.08 | 0    | 2.81 | 1.18 | 33.03 | 0.84  |
